# Supplementary material for: Peste Des Petits Ruminants (PPR) in Dromedary Camels and Small Ruminants in Mandera and Wajir Counties of Kenya
Source: Adv Virol. 2019 Mar 4;2019:4028720. doi: 10.1155/2019/4028720 (PMC6425320; doi:10.1155/2019/4028720)
Supplement: Supplementary Materials — List of tables that contain data of samples collected with their respective locations, RNA quantification, and homologous gene sequences from the NCBI used to form the phylogenetic tree. [file 4028720.f1.zip]

Archive with 13 entries (12 files):
- 4028720.f1/
- 4028720.f1/Table 1 Sample collected from tentative cases of PPR_AV_2677389.docx
- 4028720.f1/Table 10 List of primers used in the study_AV_2677398.docx
- 4028720.f1/Table 11 RNA content quantification in sample after RNA extraction_AV_2677399.docx
- 4028720.f1/Table 12 Homologous gene sequences in the NCBI database_AV_2677400.docx
- 4028720.f1/Table 2. Sample collected after field investigation distribution table_AV_2677390.docx
- 4028720.f1/Table 3 Camels examined and Sampled in Mandera_AV_2677391.docx
- 4028720.f1/Table 4 Sheep and goats examined and sampled in Mandera County_AV_2677392.docx
- 4028720.f1/Table 5. Camels examined and sampled in Marsabit County_AV_2677393.docx
- 4028720.f1/Table 6 Camels examined and sampled in Wajir County_AV_2677394.docx
- 4028720.f1/Table 7 Sheep and goats examined and sampled in Wajir County_AV_2677395.docx
- 4028720.f1/Table 8 Camels examined and Sampled in Isiolo County_AV_2677396.docx
- 4028720.f1/Table 9 PCR reaction master mix components_AV_2677397.docx
